# Supplementary material for: Thalamic deep brain stimulation modulates cycles of seizure risk in epilepsy
Source: PubMed Central journal article supplement (PMC8688461; doi:10.1038/s41598-021-03555-7), 2021-12-20
Supplement: 41598_2021_3555_MOESM1_ESM.pdf [file 41598_2021_3555_MOESM1_ESM.pdf]

## Supplementary information

| Subject | Sex | Device    | Lead location            | Dwelling | Record Duration (days) | Seizure count | Gaps |
|---------|-----|-----------|--------------------------|----------|------------------------|---------------|------|
| H1      | F   | RC+S      | ANT & Hc                 | home     | 338                    | 338           | 14%  |
| D1      | M   | NV        | frontoparietal neocortex | kennel   | 394                    | 28            | 21%  |
| D2      | M   | NV        | frontoparietal neocortex | kennel   | 395                    | 50            | 14%  |
| D3      | M   | NV        | frontoparietal neocortex | kennel   | 170                    | 85            | 1%   |
| D4      | M   | NV → RC+S | frontoparietal neocortex | kennel   | 165                    | 55            | 17%  |
| D5      | M   | NV → RC+S | frontoparietal neocortex | kennel   | 51                     | 15            | 7%   |
| D6      | M   | RC+S      | ANT & Hc                 | home     | 258                    | 45            | 37%  |
| D7      | M   | RC+S      | ANT & Hc                 | home     | 375                    | 11            | 52%  |

**Supplementary Table 1 Subject characteristics.** Gaps indicates the proportion of the recording period without iEEG data. H1 = Human 1. D1 – 7 = Dog 1 – Dog 7. RC+S = Investigational Medtronic Summit RC+S™. NV = NeuroVista Seizure Advisory System. ANT = anterior nucleus of the thalamus. Hc = hippocampus.

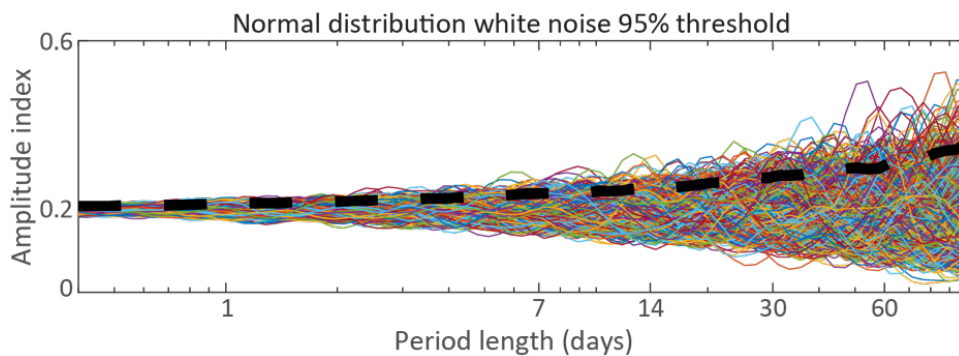

**Supplementary Figure 1.** Amplitude spectral density of  $n=1,000$  simulations of normally distributed white noise, and 95<sup>th</sup> percentile line.

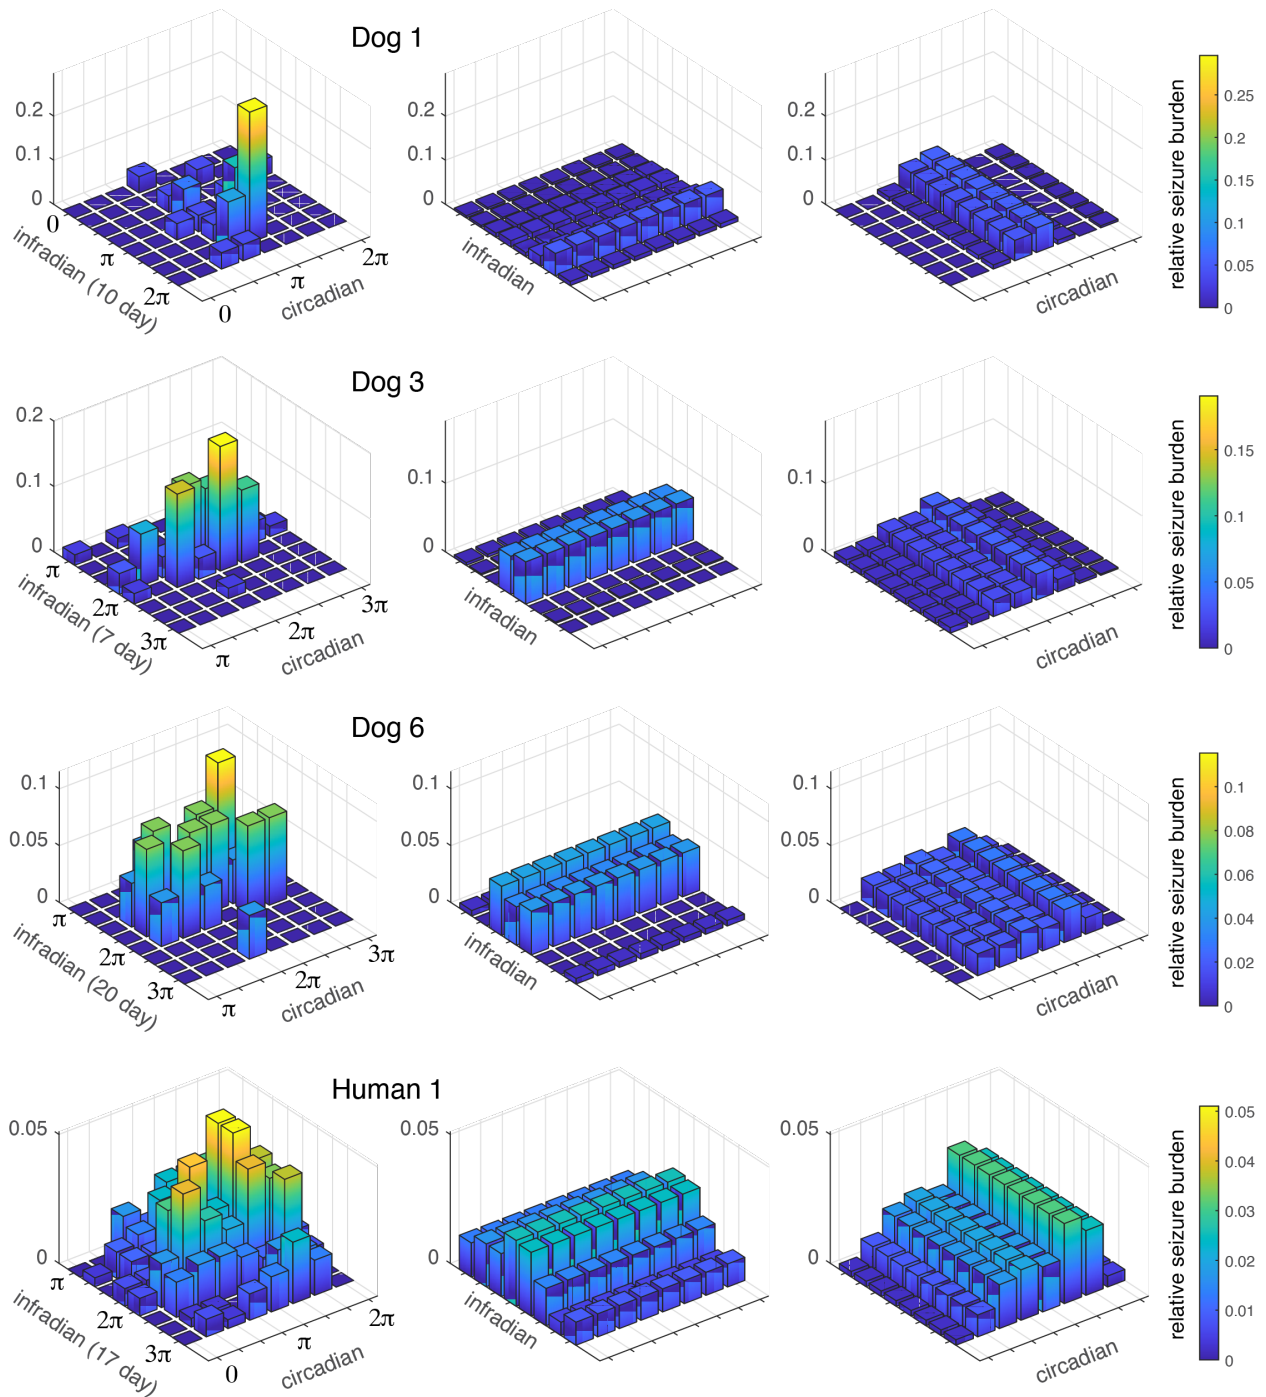

**Supplementary Figure 2 Seizure risk phase-phase plots.** Seizure risk with phase-phase analysis relative to infradian cycle-only, and circadian cycle-only analysis. Three-dimensional histograms show the burden of seizures in  $\Pi/4 \times \Pi/4$  radian steps, normalized to the total seizure count. For infradian cycle-only and circadian cycle-only plots, seizure counts are constant over the spread of the contrasting (circadian and infradian respectively) cycle.

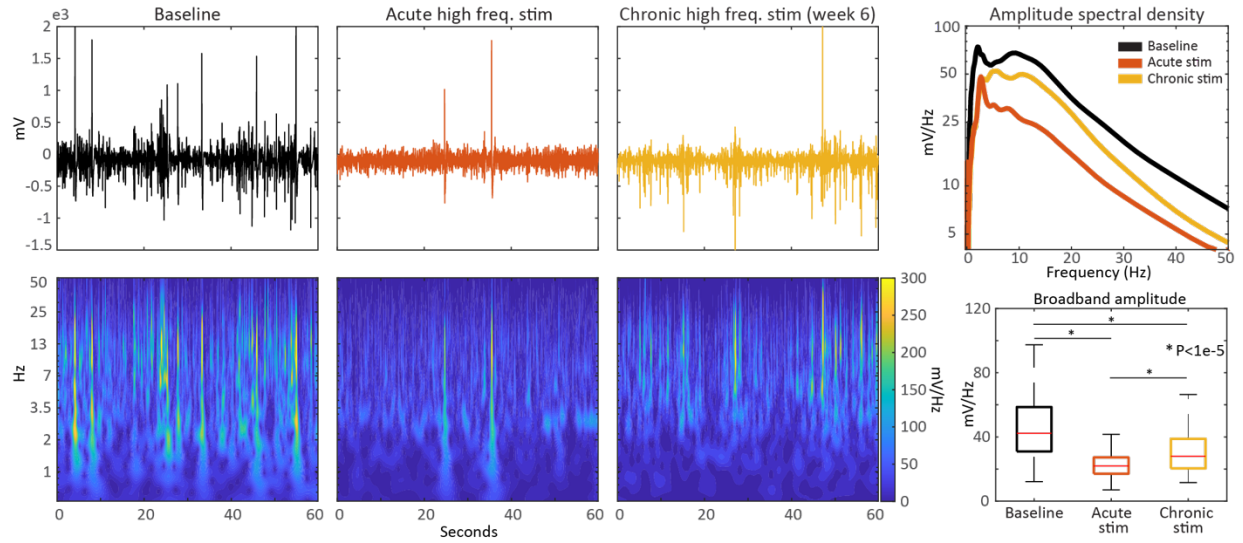

**Supplementary Figure 3 Impact of deep brain stimulation on hippocampal local field potential.**

Representative samples of hippocampal local field potential activity during stimulation off baseline, acute high frequency stimulation, and chronic high frequency stimulation. Broadband amplitude is the 1:50 Hz band mean amplitude.
